# Supplementary material
Source: PubMed Central journal article supplement (PMC2824396)
Supplement: 0911353107_pnas.200911353SI.pdf [file 0911353107_pnas.200911353SI.pdf]

# Supporting Information

Wu et al. 10.1073/pnas.0911353107

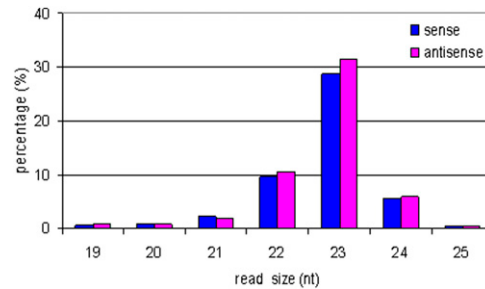

**Fig. S1.** Size distribution of positive- and negative-strand viral siRNAs cloned and sequenced from RNAi-defective 1 (*rde-1*) mutant *C. elegans* animals carrying a self-replicating recombinant RNA1 of FHV, FR1gfp [Lu R, Yigit E, Li WX, Ding SW (2009) An RIG-I-Like RNA helicase mediates antiviral RNAi downstream of viral siRNA biogenesis in *Caenorhabditis elegans*. PLoS Pathog 5:e1000286]. The *rde-1* encodes an AGO essential for dsRNA-induced RNAi and for the biogenesis of secondary siRNAs. The recombinant RNA1 of FHV does not express the RNAi suppressor B2 but expresses enhanced GFP in the position of B2.

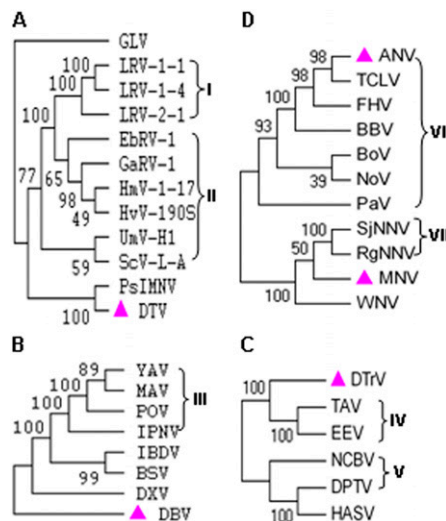

**Fig. S2.** Phylogenetic analysis of the five previously undescribed viruses in the viral family *Totiviridae* (A), *Birnnaviridae* (B), *Tetraviridae* (C), and *Nodaviridae* (D) by the Clustal W method. Viral RdRP was used in A–C, whereas CP was used in D. Trees were calculated by using the neighbor-joining method, and the reliability of each branch was evaluated with bootstrap (1,000 times repeat). The viruses discovered in this study are indicated by a pink arrowhead. Viruses in the officially recognized genera are indicated as follows: (I) *Leishmanivirus*, (II) *Totivirus*, (III) *Aquabirnavirus*, (IV) *Betatetravirus*, (V) *Omegetetravirus*, (VI) *Alphanodavirus*, and (VII) *Betanodavirus*. Abbreviations of virus names are as follows: Black beetle virus (BBV), Boolarra virus (BoV), Nodamura virus (NoV), Pariacato virus (PaV), Striped Jack nervous necrosis virus (SjnNV), Redspotted grouper nervous necrosis virus (RgNNV), and Wuhan nodavirus (WNV). *Giardia lamblia* virus (GLV), *Leishmania* RNA virus 1-1 (LRV-1-1), *Leishmania* RNA virus 1-4 (LRV-1-4), *Leishmania* RNA virus 2-1 (LRV-2-1), *Eimeria brunetti* RNA virus 1 (EbrV-1), *Gremmeniella abietina* RNA virus L1 (GaRV-1), *Helicobasidium mompa* no.17 virus (HmV-1-17), *Helminthosporium victoriae* virus 190S (HmV-190S), *Ustilago maydis* virus 1H (UmV-1H), *Saccharomyces cerevisiae* virus L-A (ScV-L-A), Yellowtail ascites virus (YAV), Marine birnavirus (MAV), *Paralichthys olivaceus* birnavirus (POV), Infectious pancreatic necrosis virus (IPNV), Blotched snakehead virus (BSV), *Thosea asigna* virus (TAV), *Euprosterina elaeasa* virus (EEV), *Nudaurelia capensis* beta virus (NCBV), *Dendrolimus punctatus* tetravirus (DPTV), and *Helicoverpa armigera* stunt virus (HASV).

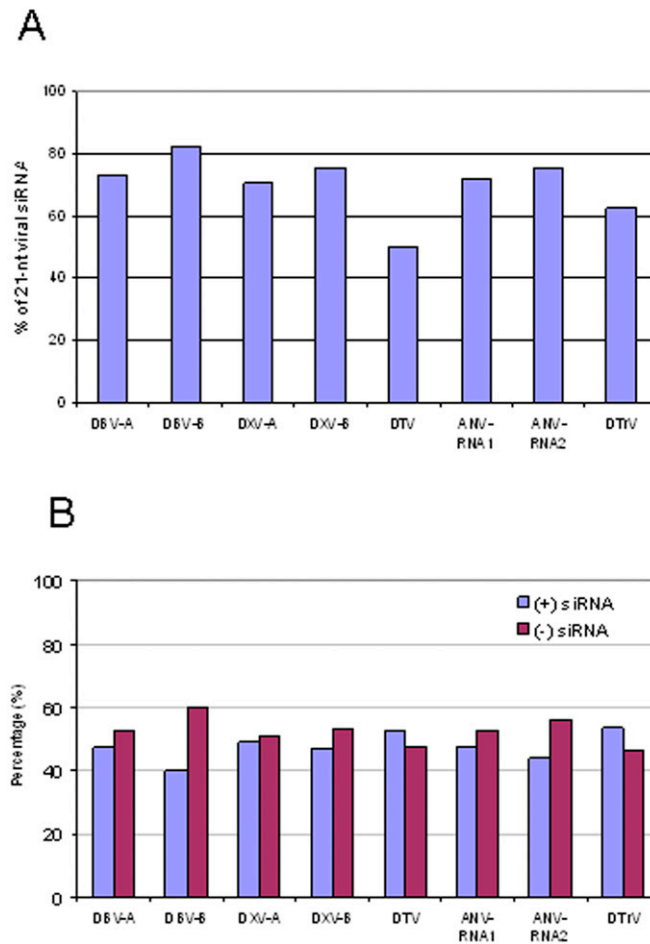

**Fig. S3.** Features of the 21-nt viral siRNAs sequenced from S2-GMR cells. (A) The 21-nt siRNA species was the most abundant of the viral small RNAs with a length of 18–28 nucleotides for all five viruses. (B) Approximately equal ratios of (+) and (–) 21-nt siRNAs for all five viruses detected.

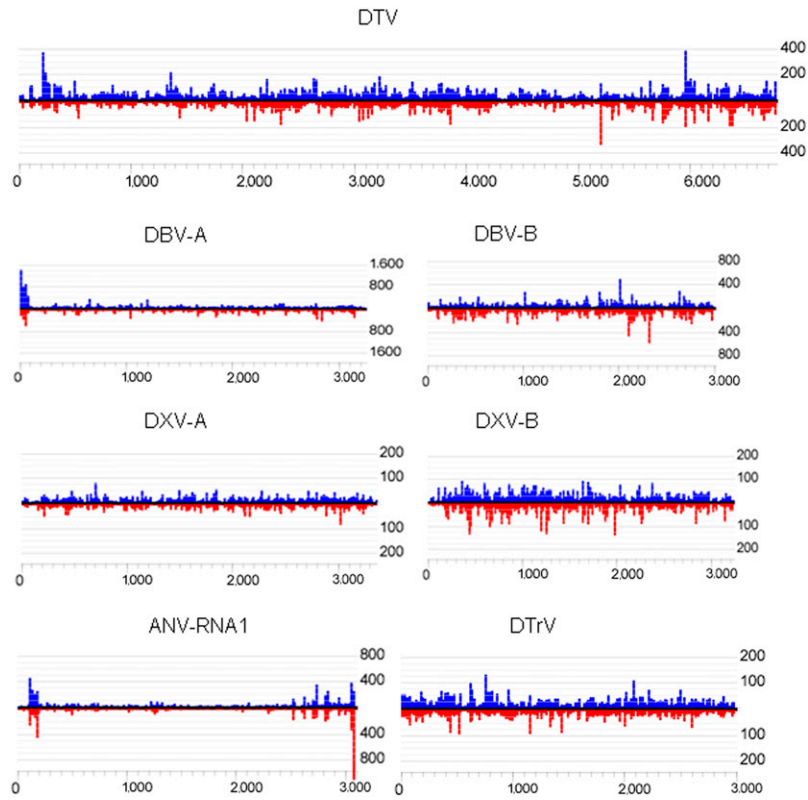

Fig. 54. Reads of perfectly matched 21-nt viral siRNAs sequenced from S2-GMR cells were plotted to the positive (blue) and negative (red) strands of each viral genome RNA segment (20-nt windows).

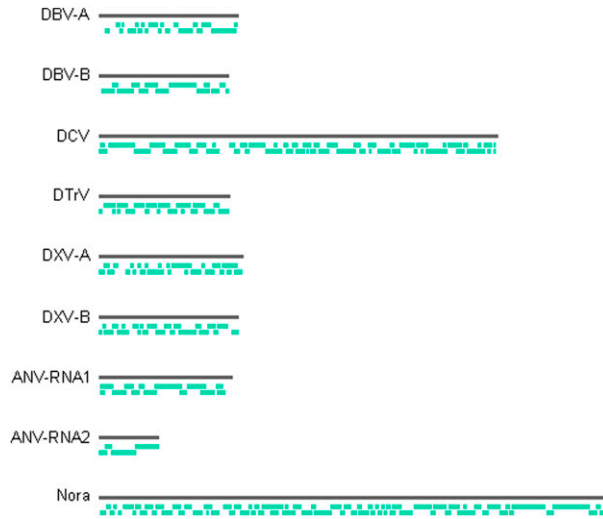

Fig. 55. Virus discovery in OSS cells by viral genome assembly from sequenced viral piRNAs of 25–30 nucleotides in length after viral siRNAs were removed.
